# Supplementary material
Source: publisher figshare collection journal article supplement (https://sage.figshare.com/ndownloader/files/14652095)

supplementary file

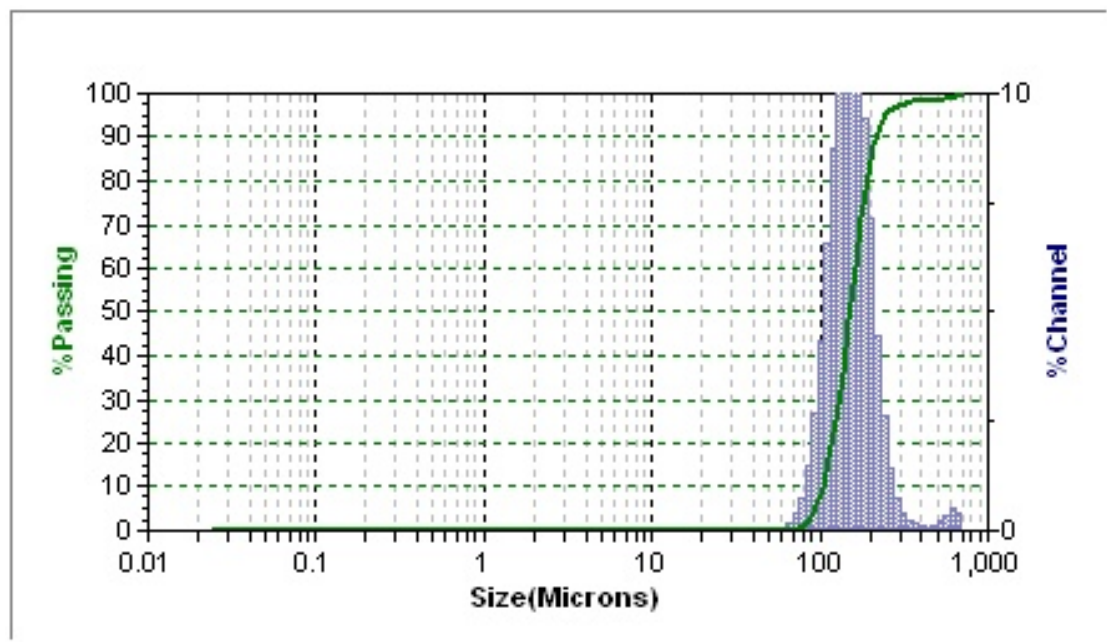

The size distribution curve of WS

Supplement: Supplementary file 1 [file 14652095]
